# Supplementary material for: Antiproliferative activity of cationic and neutral thiosemicarbazone copper(ii) complexes
Source: Royal Society of Chemistry journal article supplement (doi:10.1039/c5ra26071j), 2016-01-01
Supplement: c5ra26071j1.pdf [file c5ra26071j1.pdf]

Electronic Supplementary Information

For

**Antiproliferative Activity of Cationic and Neutral  
thiosemicarbazone Copper(II) Complexes**

M. Mohamed Subarkhan,<sup>a</sup> Rupesh N. Prabhu,<sup>b</sup> R. Raj Kumar<sup>a</sup> and R. Ramesh,<sup>a,\*</sup>

<sup>a</sup> School of Chemistry, Bharathidasan University, Tiruchirappalli 620 024, Tamil Nadu, India.

<sup>b</sup> School of Chemistry, University of Hyderabad, Hyderabad 500 046, Telangana, India.

---

\*To whom correspondence should be addressed, e-mail: ramesh\_bdu@yahoo.com, Fax: +91 431 2407045

**Table S1.** Selected bond lengths [Å] and bond angles [deg]

|              | Complex <b>1</b> | Complex <b>3</b> ·DMF·H <sub>2</sub> O |
|--------------|------------------|----------------------------------------|
| Cu–O(1)      | 1.881(3)         | 1.909(3)                               |
| Cu–N(1)      | 1.955(3)         | 1.965(4)                               |
| Cu–S         | 2.2370(13)       | 2.2121(15)                             |
| Cu–O(2)      | 1.993(3)         |                                        |
| Cu–Cl        |                  | 2.2649(15)                             |
| C(8)–N(1)    | 1.292(5)         | 1.308(6)                               |
| N(1)–N(2)    | 1.372(4)         | 1.374(5)                               |
| C(9)–N(2)    | 1.313(5)         | 1.308(6)                               |
| C(9)–S       | 1.745(4)         | 1.731(5)                               |
| O(1)–Cu–N(1) | 94.02(12)        | 91.80(15)                              |
| N(1)–Cu–S    | 86.70(10)        | 85.68(12)                              |
| O(2)–Cu–S    | 91.80(9)         |                                        |
| O(1)–Cu–O(2) | 87.10(11)        |                                        |
| Cl–Cu–S      |                  | 92.16(6)                               |
| O(1)–Cu–Cl   |                  | 91.57(11)                              |
| O(1)–Cu–S    | 176.86(8)        | 170.61(11)                             |
| N(1)–Cu–O(2) | 172.81(12)       |                                        |
| N(1)–Cu–Cl   |                  | 171.62(12)                             |

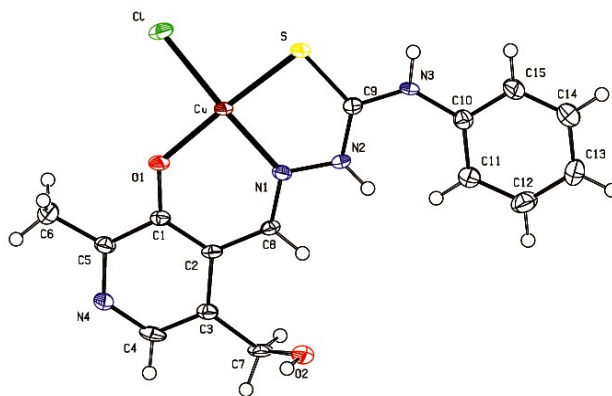

**Figure S1.** ORTEP view of complex **3** showing thermal ellipsoids at the 30% probability level. Solvent molecules omitted for clarity.

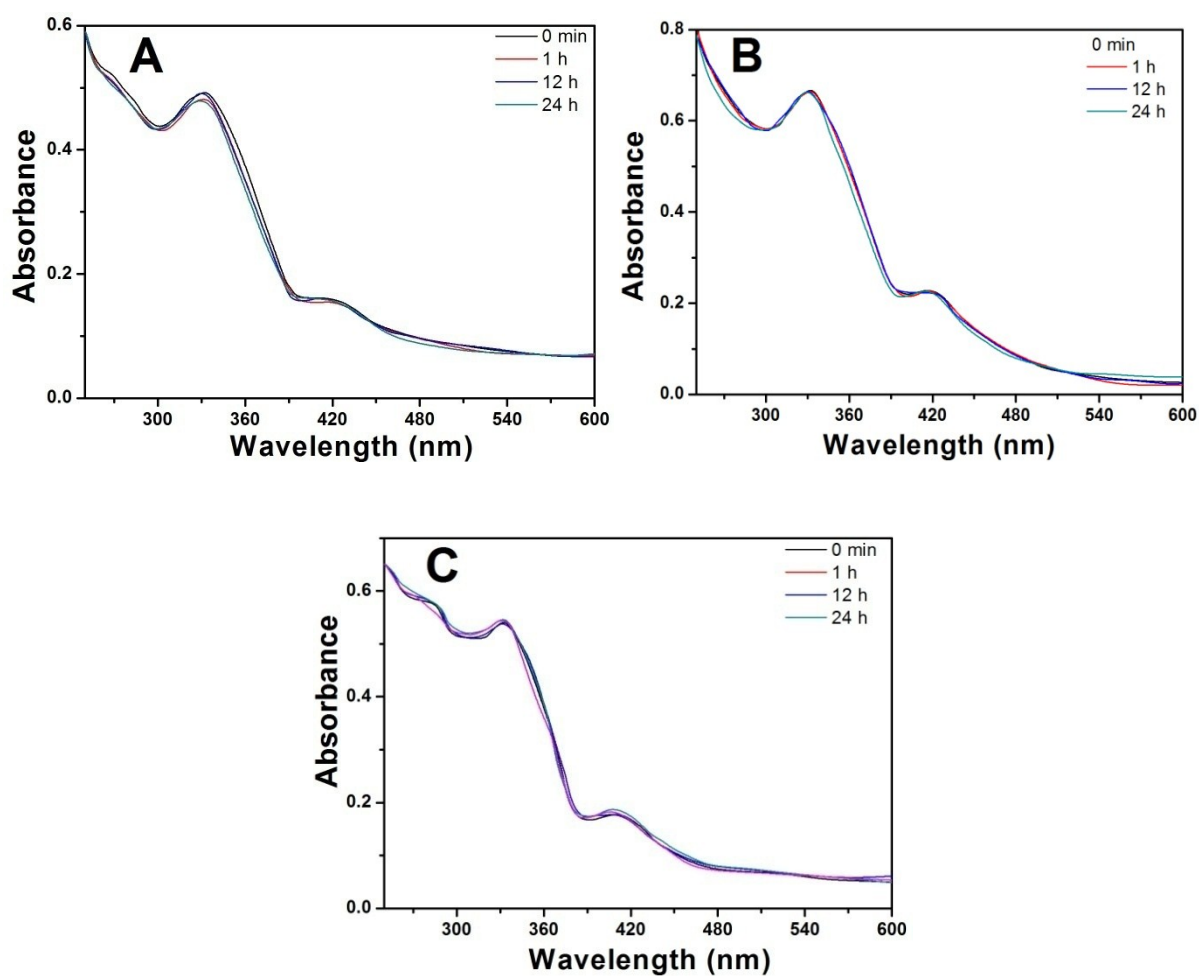

**Figure S2.** UV-Vis. absorption spectrum of complexes **1(A)**, **2(B)** and **3(C)** in aqueous PBS buffer (phosphate buffered saline solution), at pH 7.4, to a final concentration of  $1 \times 10^{-3}$  M recorded after different time intervals.

30-56 RT: 0.36-0.67 AV: 27 SB: 16 0.09-0.16 , 0.97-1.07 NL: 1.86E7  
T: + c ESI Full ms [ 100.00-500.00]

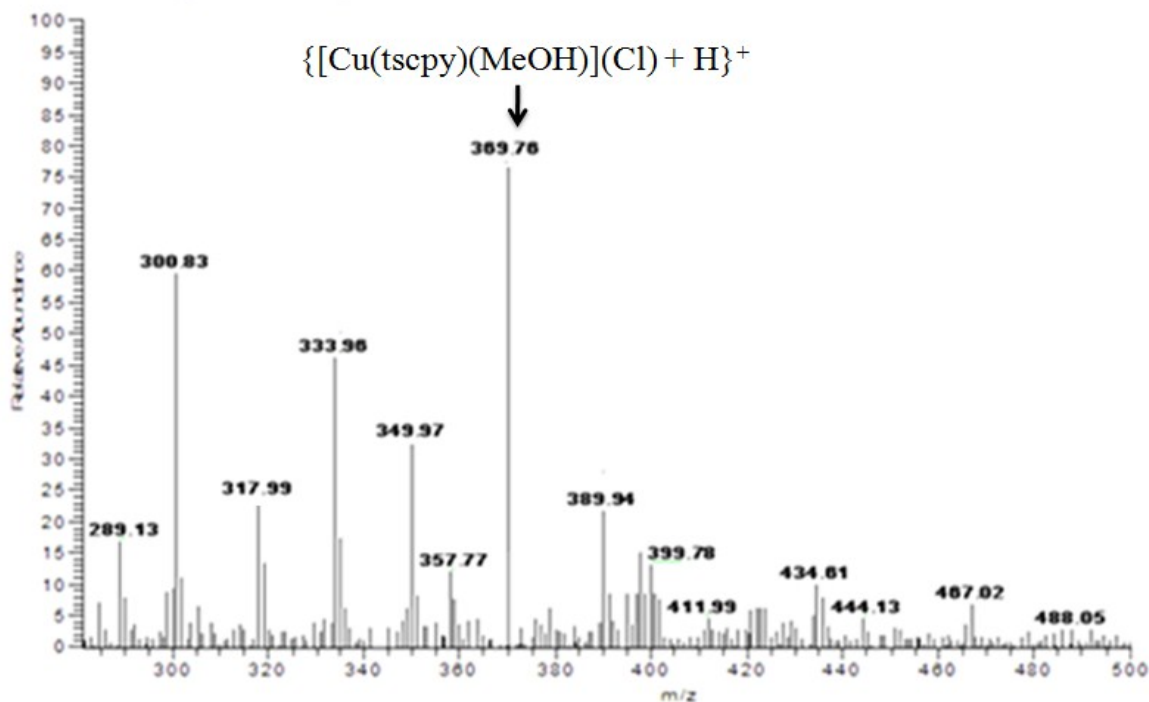

#30-56 RT: 0.36-0.67 AV: 27 SB: 16 0.09-0.16 , 0.97-1.06 NL: 3.01E6  
T: + c ESI Full ms [ 100.00-750.00]

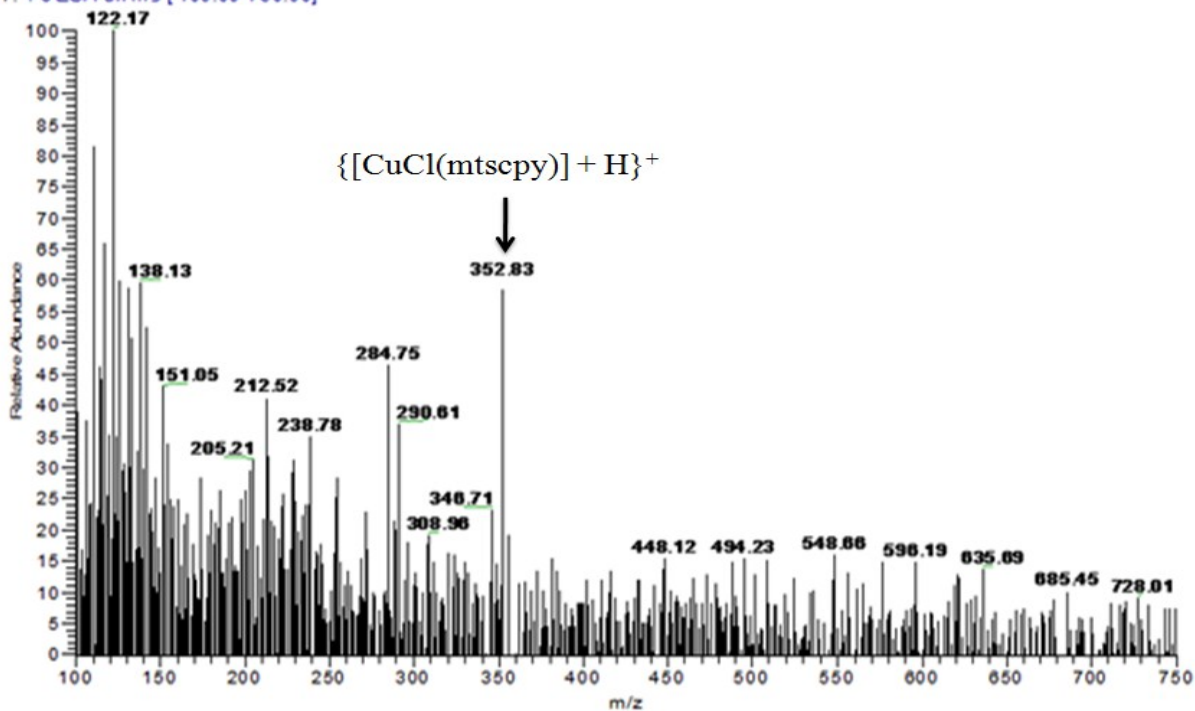

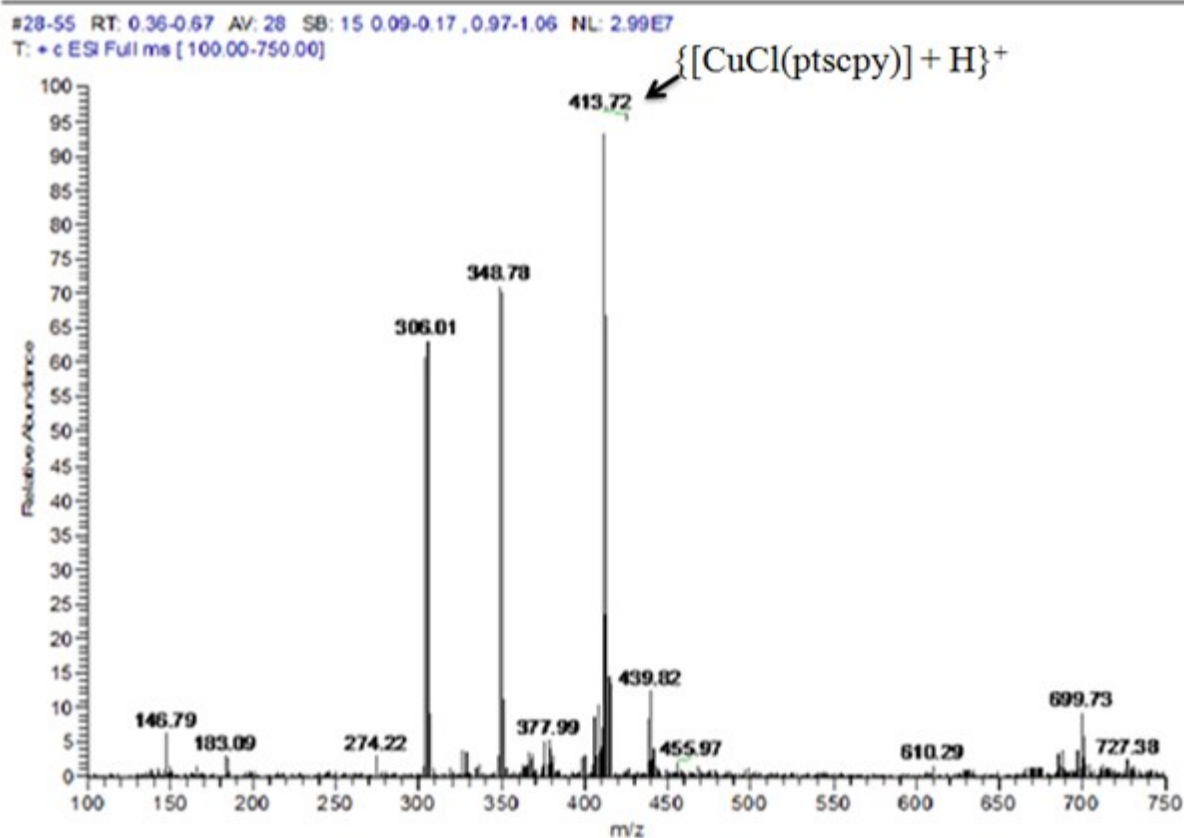

**Figure S3.** ESI-MS spectra of  $\{[\text{Cu}(\text{tscpy})(\text{MeOH})(\text{Cl})+\text{H}]\text{(1)}$ ,  $[\text{CuCl}(\text{mtscpy})+\text{H}]\text{(2)}$  and  $[\text{CuCl}(\text{ptscpy})+\text{H}]\text{(3)}\}$  in acetonitrile.

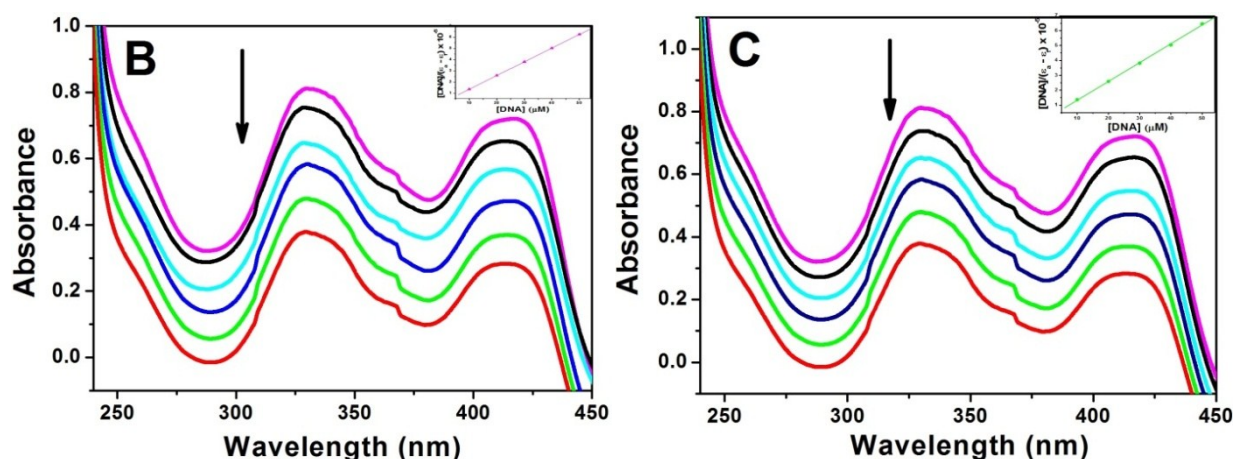

**Figure S4.** Electronic spectra of complexes **2** (B) and **3** (C), in Tris-HCl buffer upon addition of CT-DNA.  $[\text{Complex}] = 25 \mu\text{M}$ ,  $[\text{DNA}] = 0\text{--}50 \mu\text{M}$ . Arrow shows the absorption intensities decrease upon increasing DNA concentration. (Inset) Plots of  $[\text{DNA}]/(\epsilon_a - \epsilon_f)$  versus  $[\text{DNA}]$  for complexes **2** and **3** with CT-DNA.

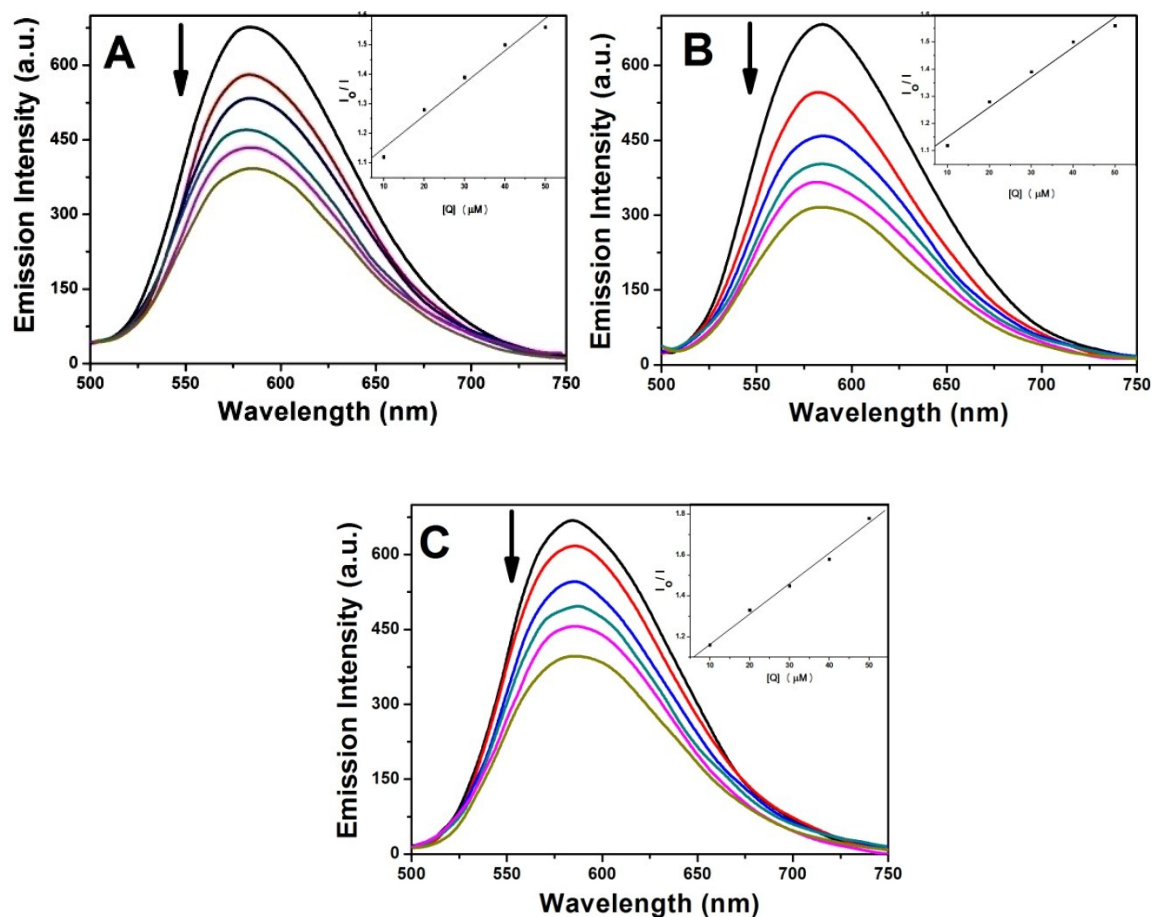

**Figure S5.** Emission titrations of complexes **1** (A), **2** (B) and **3** (C) with EB bound to DNA,  $\lambda_{\text{ex}} = 546 \text{ nm}$ ,  $\lambda_{\text{em}} = 599 \text{ nm}$ ,  $[\text{DNA}] = 12 \mu\text{M}$ ,  $[\text{Complex}] = 0\text{-}25 \mu\text{M}$ ,  $[\text{EB}] = 12 \mu\text{M}$ . Arrow shows that the emission intensity changes upon increasing complex concentration. Inset: Stern–Volmer plots of the EB–DNA fluorescence titration for complexes **1**, **2** and **3**.

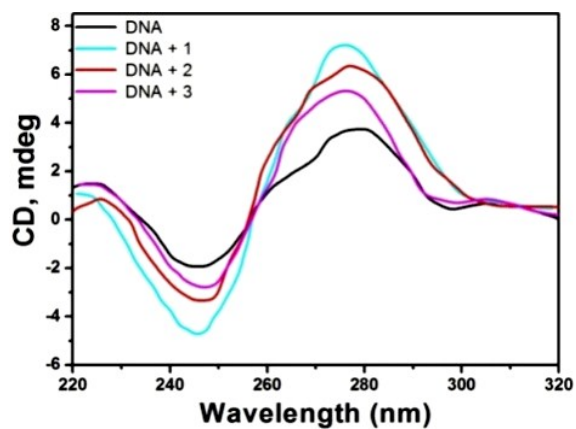

**Figure S6.** The circular dichroism spectra of free CT–DNA ( $10 \mu\text{M}$ ) and after the addition of complexes **1–3** ( $10 \mu\text{M}$ ).

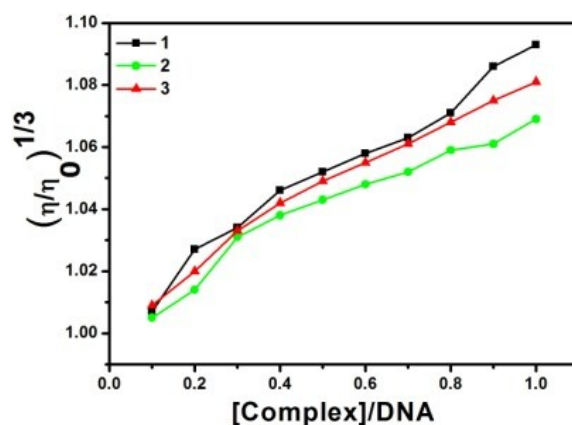

**Figure S7.** Relative viscosities of CT-DNA in the presence of the complexes 1–3

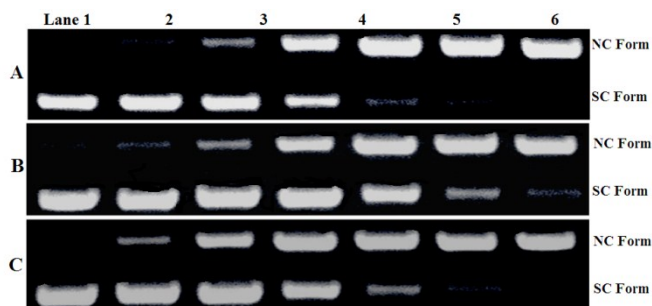

**Figure S8.** Agarose gel electrophoresis pattern for the cleavage of pUC19 DNA by complexes 1-3 at 37°C after incubation for 1 h. (A), (B) and (c) at different concentrations of 1; lane 1: DNA control; lane 2: 5 μM complex (1), (2) and (3) + DNA; lane 3: 10 μM complex (1), (2) and (3) + DNA; lane 4: 15 μM complex (1), (2) and (3) + DNA; lane 5: 20 μM complex (1), (2) and (3) + DNA; lane 6: 25 μM complex (1), (2) and (3) + DNA; lane 7: 30 μM complex (1), (2) and (3) + DNA respectively.

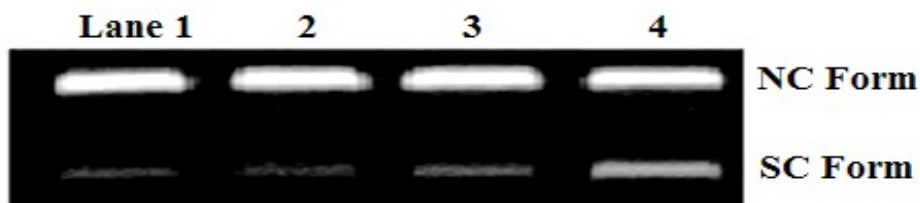

**Figure S9.** Agarose gel electrophoresis pattern for the supercoiled (SC) pUC19 DNA linearized by complex 1 (25 μM) without reductant after incubation: Lane 1, (100 μM) NaN<sub>3</sub> + 1; Lane 2, (4 units) superoxide dismutase + 1; Lane 3, (10%) DMSO + 1, Lane 4, ethanol + 1.



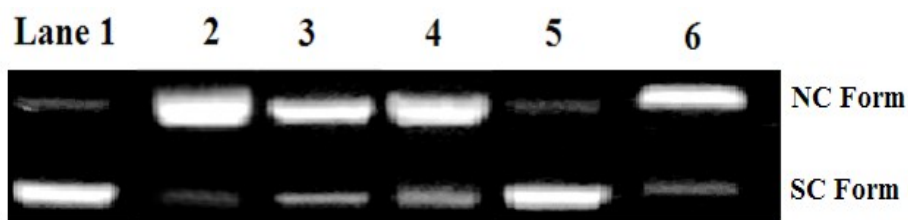

**Figure S10.** Agarose gel electrophoresis pattern for the ligation of supercoiled (SC) pUC19 DNA linearized by complexes **1-3**: Lane 1, DNA control; Lane 2-4, pUC19 supercoiled DNA cleaved by complex **1-3**; Lane 5, ligation of linearized pUC19 supercoiled DNA by T4 DNA ligase, Lane 6, pUC19 supercoiled DNA cleaved by with adding H<sub>2</sub>O<sub>2</sub> T4 DNA ligase.

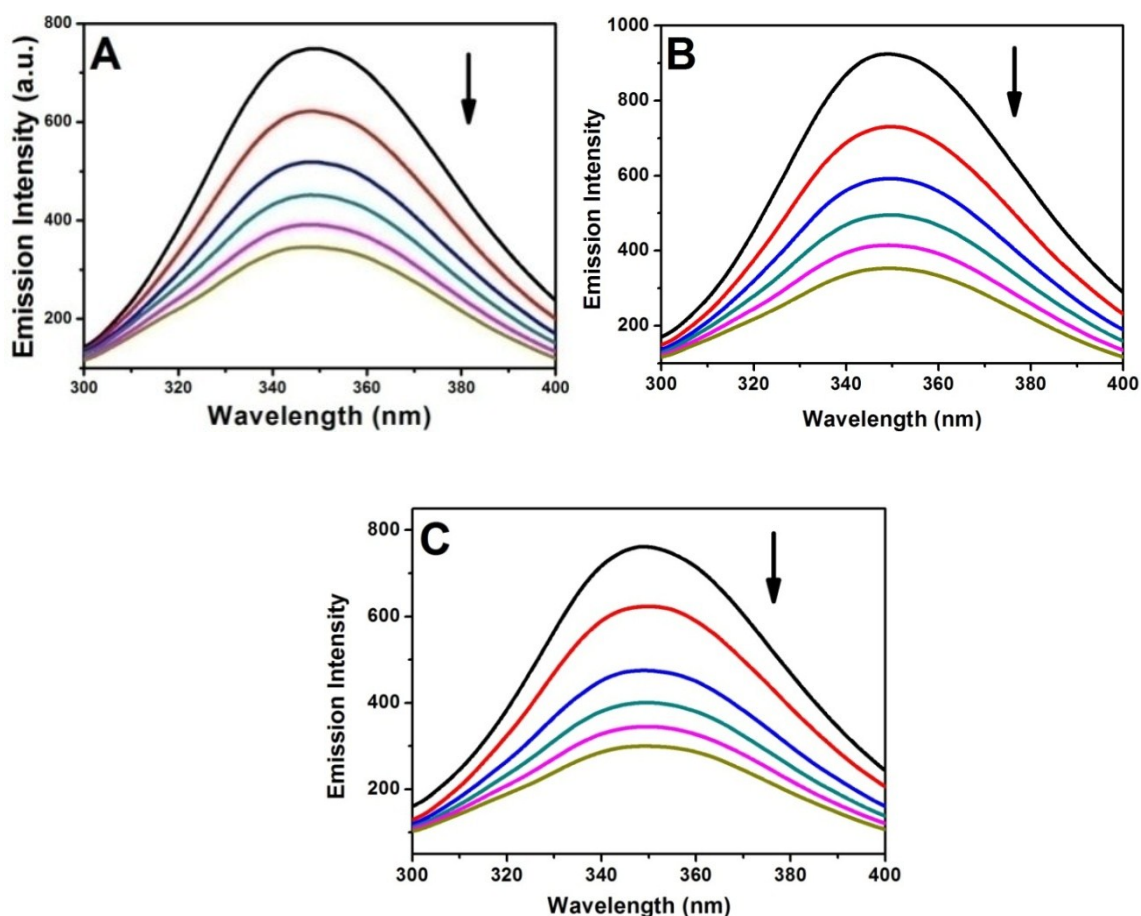

**Figure S11.** Emission spectrum of BSA (1  $\mu\text{M}$ ;  $\lambda_{\text{ex}} = 280 \text{ nm}$ ;  $\lambda_{\text{em}} = 349 \text{ nm}$ ) in the presence of increasing amounts of complexes **1** (A), **2** (B) and **3** (C) (0–25  $\mu\text{M}$ ). Arrow shows that the emission intensity changes upon increasing complex concentration.



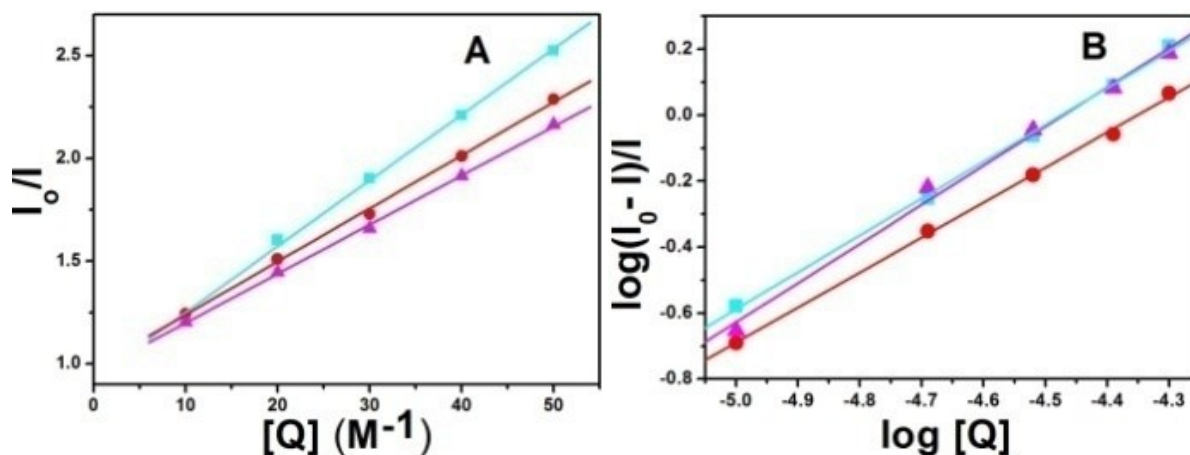

**Figure S12.** Stern–Volmer (A) and Scatchard (B) plots of the BSA fluorescence titration for complexes 1–3.

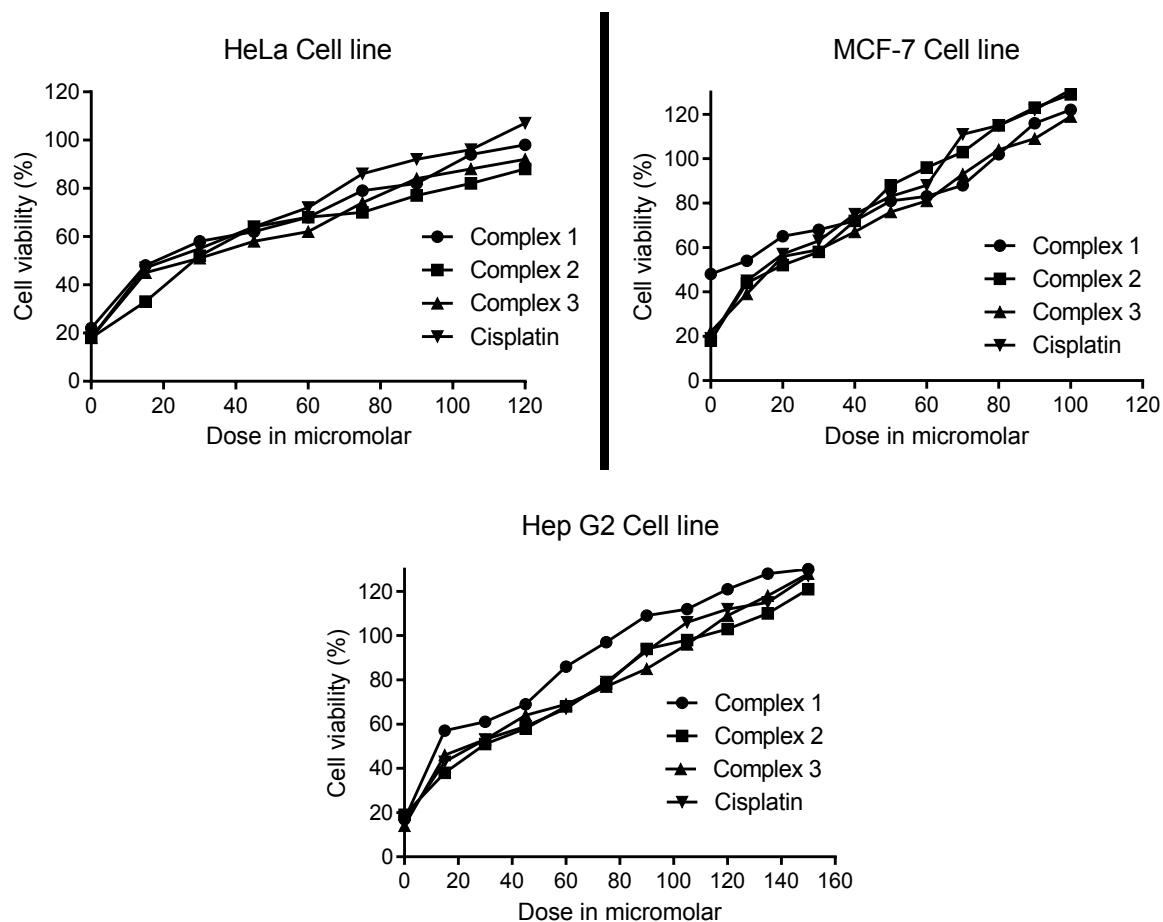

**Figure S13.** Cell viability plots showing the cytotoxic effect of the complexes 1-3, in HeLa, MCF-7 and Hep G2 cancer cell lines.

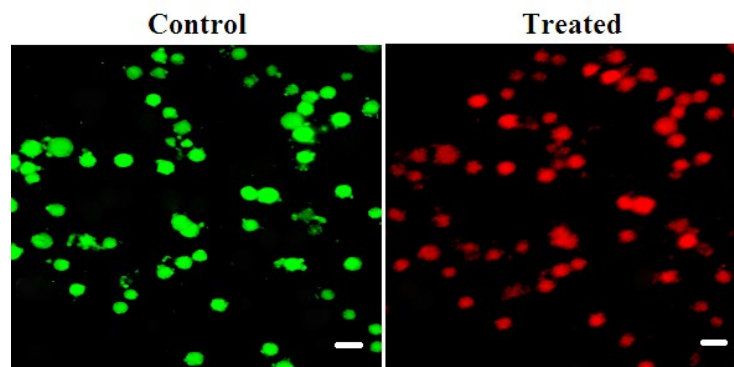

**Figure S14.** Fluorescence microscope images of Annexin V-FITC staining with MCF-7 cells treated with complex **1** ( $IC_{50}$  concentration) for 24 h. The scale bar 20  $\mu m$

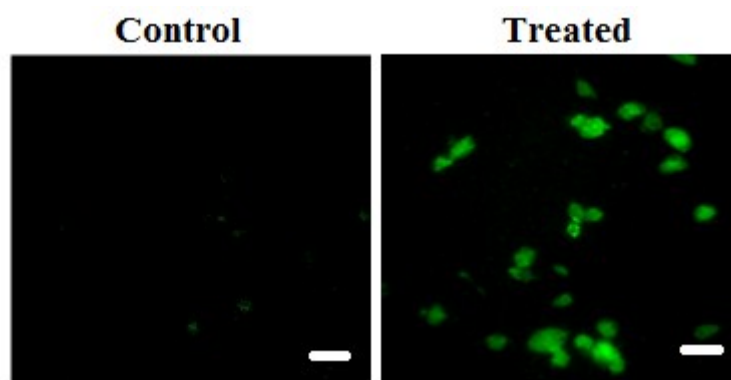

**Figure S15.** Reactive oxygen species level in MCF-7 cells against complex **1** ( $IC_{50}$  concentration) for 24 h. The scale bar 20  $\mu m$

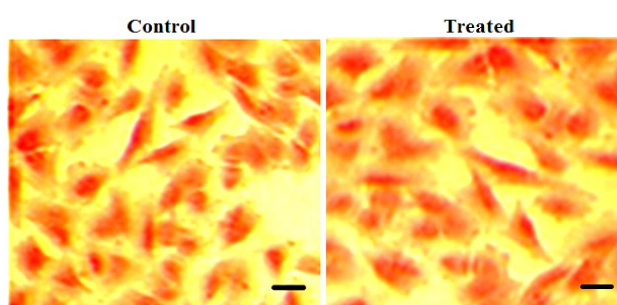

**Figure S16.** TUNEL assay of NIH 3T3 cells were treated with complex **1** for 24 h. The scale bar 40  $\mu m$ .
